# Supplementary material for: Ecosystem sequencing of the boreal forest mycobiome reveals high substrate specificity
Source: Research Square preprint supplement (doi:10.21203/rs.3.rs-7774568/v1), 2025-10-14
Supplement: Supplementary file 1 [file 74bdb961281d32152a8a5227.docx]

# **Ecosystem sequencing of the boreal forest mycobiome reveals high substrate specificity**

Markus Osaland Fjelde1, Håvard Kauserud1, Rune Halvorsen3, Celina Nilsen 1, Heidi Sjursen Konestabo 4, Inger Skrede1,Sundy Maurice 1, 2

1Section for Genetics and Evolutionary Biology, Department of Biosciences, University of Oslo, P.O. Box 1066 Blindern, NO-0316, Norway. 2Institut de Systématique, Evolution, Biodiversité (ISYEB), Muséum national d’Histoire naturelle, CNRS, Sorbonne Université, EPHE-PSL, Université des Antilles, CP39, 57 rue Cuvier, 75005 Paris, France 3Natural History Museum, University of Oslo, P.O. Box 1172, Blindern, NO-0318 Oslo, Norway. 4Norwegian Institute of Public Health, Pest Control, PO Box 222 Skøyen, N-0213 Oslo, Norway.

*Corresponding authors: mfjelde023@gmail.com and sundy.maurice@mnhn.fr

Supplementary information (SI)

Ecosystem sequencing of the boreal forest mycobiome reveals high substrate specificity

Markus Osaland Fjelde1, Håvard Kauserud1, Rune Halvorsen3, Celina Nilsen 1, Heidi Sjursen Konestabo 4, Inger Skrede1, Sundy Maurice 1, 2

Content:

Supplementary Material and Methods and Supplementary Tables 1-8 and Figures 1-8 and references

**Supplementary Material and Methods**

**1. Study sites**

The study was conducted in three near-natural forests located across South-Eastern Norway (59°07ʹN-60°92ʹN, 09°70ʹE-12°31ʹE; elevation 264-610 m.a.s.l.). In these sites, namely Tretjerna, Skotjernfjell and Blåfjell (Supplementary Fig. 1), the mean annual temperatures are 2.3 °C, 2.7 °C and 4.8 °C and mean annual precipitation is 821 mm, 974 mm and 1,041 mm, respectively (Table S1). These three forests were dominated by an overstory of Picea abies (L.) H. Karst. (Norway spruce) and the ground vegetation consisted of graminoids, forbs and dwarf shrubs mainly *Vaccinium myrtillus* L. The bottom layer was primarily composed of bryophytes, among which Hylocomium splendens (Hedw.) Schimp. and Pleurozium schreberi (Willd. ex Brid.) Mitt. were the most common species.

**2. Study design and sampling**

Based on existing literature and our knowledge of fungal ecology in boreal ecosystem, we selected a panel of 26 different substrates (including living hosts and inert material; see Fig. 1 in the main text) to examine the fungal diversity and community composition. The prerequisites were that all substrates were present in each of the three near-natural spruce-dominated forests. Whenever possible, sampling was located within the 15 m × 15 m main plot, and if a given substrate was not located within this defined area, we adopted an opportunistic sampling up to a 150 m radius from the plot center. Given that sampling 26 substrates (5 replicates each) already require a considerable amount of material to be carried, we were keen on adopting a low-technology sampling procedure that could easily be transferable to any other forest ecosystem, especially in isolated regions, thus avoiding equipment that would function on battery.

At each locality we established five subplots of 1 m × 1 m each, at the four corners and the fifth in the center of the main 15 m × 15 m plot, corresponding to the 5 replicates at the forest-level (Fig. 1). The waypoint (including placeholder for geolocation) was recorded for the five subplots. In each 1 m × 1 m subplot, we sampled the substrates grouped under the categories soil (litter and organic) and ground vegetation. Around each 1 m × 1 m subplot, we selected five spruce trees of similar age and size and located within a maximum of 10 m distance from which we sampled two lichen species and the tree-related substrates. Likewise, we selected five spruce dead wood logs at different decay stages and sampled sawdust and invertebrates (mesofauna; Fauna) outside the defined sampling plots, but within a 150 m transect.

While the other substrates like fungal fruit bodies of *F. pinicola* and *T. abietinum*, moose droppings and aquatic (stream, ponds), when not occurring in the proximity of the main plot, were collected in an opportunistic manner in a radius of 150 m from the middle of the main 15 m × 15 m plot. The sampling was conducted in august 2022. For each of the 26 substrates, we collected 5 replicates in each forest, totaling 15 samples for a given substrate across the three forests. In this study, we analyzed a total of 390 samples (26 substrates x 5 replicates x 3 forests). To account for substrate heterogeneity and better capture fungal diversity, each replicate sample is often composed of a pool of five individual samples collected at very fine spatial geographic scale. When sampling and processing the substrates in the field, we used sterile nitrile gloves, cleaned and sterilized all sampling equipment with 70% ethanol and flamed between each set of replicates and changed equipment between substrates. All samples were conditioned in zip-lock bag and stored by replicated sub-plots at -20 °C until further processing.

***Substrate category (i): Soil-related substrates***

In each 1 m × 1 m subplot, we first collected five spruce cones (**S21**) of different sizes and ages. We bored 5 soil cores using a soil corer (4 cm diameter, 36 cm length), 4 from the corners and 1 in the center of each subplot. From each soil core, we first removed the vegetation cover and coarsely separated the litter and the organic layer. We sieved (5 mm mesh). all five litter cores sampled at the subplot-level (1m × 1m) that we pooled into a single litter sample (**S2**). Likewise, the five organic cores were sieved and pooled into one sample (**S3**). After sieving both organic and litter separately, we gathered all roots from both layers into one root sample root (**S4**). We replicated this sampling procedure across the five subplots within each forest. To reduce cross-contamination between replicates, we thoroughly cleaned and sterilized the soil corer and sieve, used cleaned equipment and changed gloves between samples and subplots.

For the soil fauna (**S1**), we selected a dead wood log (**S19**) and sampled 5 litter cores (5.5 cm diameter, 13 cm length) altering both sides of the log, approximately 10-20 cm away from the log and 5 cm into the litter layer. We subsequently extracted mesofauna from these cores in the laboratory (see section 3 sample processing, protocol 4). For each replicate, we placed the 5 soil cores in plastic cylinders with a green mesh (microns), sealed in zip lock bags and stored at 4 °C overnight.

***Substrate category (ii): Ground vegetation substrates***

For the ground vegetation we selected two dominant bryophyte species: *Pleurozium schreberi* (Willd. ex Brid.) Mitt. and *Hylocomium splendens* (Hedw.) Schimp. and two dominant vascular plant species: *Vaccinium myrtillus* L. (Ericaceae) and *Avenella flexuosa* L. (Poaceae). Using a hand pruner or scissors, we collected both species in the 1 m × 1 m subplot, or if absent preferably as close as possible to the edge of the subplot. As reported in previous studies, the fungal community composition differs between the alive greenish tissues and the senescent brownish parts of the vegetation2,3. We thus separated the above ground (leaves and stem) from the roots that we processed as two distinct samples, (A) for aboveground and (B) for belowground. Likewise for the bryophytes, we separated the green part (A) from the senescent part (B). Each replicate consisted of a collection five individual specimens sampled in the 1 m × 1m subplot.

***Substrate category (iii): Tree related substrates***

For the standing living trees, we sampled four different components of the tree: surface, bark, core, and spruce needles. First, we selected an appropriate tree close to the 1 m × 1 m subplot and, we measured and recorded the diameter of the tree. Following a factorial sampling design, we divided the tree trunk into 12 sections, based on the four cardinal directions (N, W, S, E) and three vertical heights (1, 2 and 3) approximately 50 cm from the bottom, with level 3 being nearest to the ground. With a steel brush, we vigorously but carefully scratched the bark surface once at each of the 12 sections into a steel-made collection tray attached to the collector´s waist with a snap buckle belt. We then emptied the dust scratched from each tree into a plastic zip-lock bag, corresponding to a replicate of the sample bark surface (**S13**). The bark sample (**S14**) corresponds to a small piece (~2 cm2) of bark that was cut off from each tree section that was previously scratched to examine the fungal community inside the bark. Using an increment borer (200 × 3.5 mm), we sampled one core wood sample per height section from the north facing side, per tree we sampled three wood cores that were pooled into a single replicate (**S20**).

Using a camping saw mounted on a telescopic pole, we cut five branches from each selected tree between 4-7 m height according to the protocol described by Nilsen et al4. Then, using a pair of scissors we cut the fresh needles of the current year and placed them in zip-lock bag (**S22**). We sampled two lichen species (Ascomycota, Lecanorales): *Hypogymnia physodes* (**S15**) and *Usnea dasypoga* (**S16**). For each species, we collected between one and three thalli from the spruce tree chosen as standing living trees or from trees nearby if the liches were not present. Similarly, for fungi, we selected two polypores species: *Fomitopsis pinicola* (Basidiomycota, Antrodiales) and *Trichaptum abietinum* (Basidiomycota, Hymenochaetales), corresponding to sample **S17** and **S18**, respectively. We collected only one fruit body of each species when present on the same logs from which we sampled the sawdust (**S19**), alternatively from a nearby log. Concerning dead wood, we sampled sawdust from downed logs of *Picea abies* representing all stages of decomposition. First, we located the nearest appropriate log to each 1 m ×1m subplot. To obtain an exhaustive representation of the fungal communities involved in the process of wood decomposition at the forest-level, we selected five logs in various decay stages (targetting1-5). For each replicate, we drilled five holes across both side of the log and sampled the sawdust in one common zip-lock bag (**S19**). The spacing between the holes depended on the length of the log, typically ranging between 1 to 2 m.

***Substrate category (iv): Aerial-aquatic substrates***

The substrate category aerial-aquatic samples consisted of aerial spores (**S23**) and water from pond (**S24**), and stream (**S25**). We sampled airborne fungal spores using filtered spore traps as described by Torp5. In each forest, we mounted five passive spore traps one week prior to the start of the fieldwork. We set-up four spore traps in the 1 m × 1 m subplot at each corner and the fifth in the center. Each passive spore trap consisted of a wooden pole fixed in the ground right next to the 1 m × 1 m subplot to which we fastened a metal holder around 1.2 m above the ground. A plastic tube fitted with a funnel was mounted on top, with a metal grid positioned to prevent debris from getting into the spore trap. A 1 µm cyclopore membrane was inserted on the removable sieve fixed to the bottom of the plastic tube. The spore traps passively captured spores projected by wind and rain. After two weeks of exposure, we placed the filters in individual labelled zip-lock bags.

For aquatic substrates, we first selected the desired pond or stream and recorded the coordinates. We measured the temperature of the water *in situ*. Biological material was sampled onto the Sterivex™ Pressure filters (Millipore® 0.22 μm) following a standardized procedure: (1) We cleaned all buckets and the telescopic pole with ethanol. (2) We cleaned a 10-l bucket three times with water from the system. (3) We mounted a 1-1 bucket onto the telescopic pole and rinsed the bucket three times with water from the system. (4) We took out a 50 ml syringe and a filter, labelled the filters with substrate codes, loaded and pressed out water from the system with the syringe three times. (5) Using the telescopic pole and 1-l bucket (ca. 3 times = 3 l), we filled the 10-l bucket and loaded the syringe with water and screwed on the filter. (6) We pressed through as much water as possible and noted down number of times needed to pass through all the water. (7) We immediately placed the filters on dry ice. (8) We filled up one 1-l bottle with water directly from the system at replicate 1. We repeated steps 1 to 7 five times, moving up the pond (**S24**) or around the stream (**S25**) for a total of 5 replicates per forest.

***Substrate category (v): Feces substrates***

For the substrate moose droppings (**S26**), we adopted a more opportunistic sampling. We walked around the forest and located five different dropping piles. From each pile, we collected five pellets and placed them in zip-lock bags.

**3. Sample processing**

Except for the aquatic samples, all substrates collected were placed into plastic zip-lock bags and stored in separate containers (all 5 replicates per substrate were grouped together) until the end of the day of fieldwork when they were stored at -20 °C awaiting further processing.

We established four main protocols for processing the samples from the 26 different substrates. The weighting, freeze drying and crushing steps are common steps for all substrates except for aerial spore traps (**S23**), soil fauna (**S1**) and water samples from the ponds (**S24**), and streams (**S25**). While DNA from these samples were directly extracted (Protocol 4), without performing any of these three sample preparation steps. These protocols were established based on our experience working with diverse boreal substrates and backed up with literature search, considering the inherent characteristics of the substrates e.g. the amount of material to be processed (adjusted for each substrate), total material sampled, feasibility of surface sterilization, solubility of the sample in solvent etc. were considered during protocol design. We calculated the humidity content of each sample, by weighing a set amount of fresh mass, freeze dried over 48h and measured the remaining dry mass.

***Protocol 1: Soil and feces samples*** (**S2** Soil litter**, S3** Soil organic**,S26** Moose droppings). **S26** were processed directly from step 4.

1. Under a microbiological safety cabinet, we used a cleaned and sterilized 5 mm mesh steel sieve with 70% ethanol and flamed with Fireboy.
2. We sieved each soil sample, the organic and the litter layer separately, using a set of sterilized equipment.
3. For each sample, we weighted a 50 ml Falcon tube, fill-in around 2/3 of the tube (~10g) with sieved soil.
4. The Falcon tubes were covered with filter paper and sealed with tape. We placed the lids on a tray lined with filter paper, with cap openings down to avoid air contact.
5. We placed the samples in a plastic box with lid and leave in -20 °C for 12-24 h or -80 °C for 30 min, prerequire for freeze-drying.
6. We transferred the samples in a freeze dryer (GAMMA 2-16 LSC) for 48 h. We loaded maximum 45 samples per run. We ensured that the vacuum reached at least 0.04 mbar.
7. After freeze drying, we removed the paper and tape and placed the lids back. We weighted the samples and noted down the dry weight (tube + sample). Then added 2-4 sterilized Zirconium oxide beads 6.8 mm (Saveen Werner) per Falcon tube.
8. We crushed the samples for 1 min at 30 Hz using a FastPrep®-24 (MP Biomedicals) and flipped sample tubes to avoid overheating and repeated the crushing step. We removed the beads, brushed and washed with distilled water before sterilizing in 0.4 M HCl for 1 min.
9. We aliquoted 1 g of grinded sample to a new labelled 50 ml Falcon tube, added 10 ml of CTAB buffer, vortexed vigorously for 2 min and stored at -80 °C until DNA extraction.

***Protocol 2. Plant material with surface sterilization*** (**S4** Roots, **S5** *Avenella flexuosa* A, **S6** *Avenella flexuosa* B**, S7** *Vaccinium myrtilis* A, **S8** *Vaccinium myrtilis* B, **S9** *Hylocomium splendens* A, **S10** *Hylocomium splendens* B, **S11** *Pleurozium schreberi* A, **S12** *Pleurozium schreberi* B, **S22** Spruce needles).

1. For substrates S4, S6 and S8, we washed the samples thoroughly in distilled water and dried on filter paper at room temperature before surface sterilization. For the rest, we surface sterilized a subsampled of what we collected in the forests and stored the rest of the material as back-up at -80 °C.
2. We surface sterilized the vegetation samples directly in Falcon tubes with 70% ethanol for 1 min, followed by 2 min in 3.5% sodium hypochlorite, with two washes of 2 min in distilled water, all steps performed under 100 rpm agitation.
3. We air-dried the substrates with absorbent paper in Petri dishes for about 10-15 min under the safety cabinet.
4. We then cut the plant material into smaller pieces using a sterile scalpel and tweezer under the safety cabinet (S4, S10, S11, S12, S13).
5. We split samples into two aliquots (one backup and one working sample) and stored the backup at -80 °C.
6. We recorded the dry weight of each Falcon tube with the lid, removed the lid and tared the weight of the Falcon tube. Sample material was added to a maximum of 1 g for most substrates or a minimum 2 g for dead wood, fungi and moose droppings, preferably larger amount if enough material was available. We standardized for all samples across substrate (weigh equal amounts ± 0.5g).
7. We placed the samples in a plastic box with lid and leave in -20 °C for 12-24 h or -80 °C for 30 min, prerequire for freeze-drying.
8. The Falcon tubes were covered with filter paper and sealed with tape. We placed the lids on a tray lined with filter paper, with cap openings down to avoid air contact.
9. We transferred the samples in a freeze dryer (GAMMA 2-16 LSC) for 48 h. We loaded maximum 45 samples per run. We ensured that the vacuum reached at least 0.04 mbar.
10. After freeze drying, we removed the paper and tape and placed the lids back.
11. We weighted each sample and noted down the dry weight (Falcon tube + material). Then added a sterilized Zirconium oxide bead 6.8 mm (Saveen Werner) per tube. We crushed the samples 1 min at 30 Hz, flipped the sample tubes and repeated the crushing. We used a FastPrep®-24 (MP Biomedicals) for crushing. We removed the beads, brushed and washed with Deconnex, rinsed with distilled water before sterilizing in 0.4M HCl for 1 min, followed by another rinsing step with distilled water.
12. We aliquoted the desired targeted weight for each sample to a new tube and proportionally adjusted the volume of CTAB buffer to each substrate for DNA extraction. For samples in 2 ml Eppendorf, we added 800 µl of CTAB. We vortexed vigorously for a couple of mins and stored at -80 °C.

***Protocol 3. Sample processing of other substrates that Substrates included***: **S1** Spruce cones, **S14** Bark surface, **S15** Bark, **S16** Living tree core, **S18** Dead wood core **S19** *Fomitopsis pinicola*, **S20** *Trichaptum abietinum*, **S21** *Hypogymnia physodes*, **S22** *Usnea dasypoga*

1. We labelled 50 ml Falcon tubes and lids with sample IDs
2. For the substrates using a sterilized scalpel and tweezers, we cut the sample into smaller pieces in a sterile Petri dish.

**S17** *Fomitopsis pinicola* was cut small pieces (ca. 0.5 cm3 × 10-20 pieces) from the inner pore layer (to fill approx. 1/3 of the volume of an Eppendorf). Likewise, for **S18** *Trichaptum abietinum,* we cut the fruit bodies into small pieces, ensuring to avoid bark pieces and filled approx. 1/3 of the Eppendorf. For the sample **S15** *Hypogymnia physodes*, we carefully removed the lichen thalli from the bark pieces and cut the thalli into smaller pieces using a sterile scalpel. For the sample **S16** *Usnea dasypoga,* we cut smaller pieces directly into a Falcon tube using scissors in sterile conditions.

1. We recorded the weight of the Falcon tube with the lid, removed the lid and tared the balance, before weighing up to minimum 2g of material, preferably more if there was enough sample.
2. We sealed the Falcon tubes with filter paper and tape, to avoid cross contamination between samples, especially for electrostatic material. We filled 50 ml racks that we placed at -20 °C for 12-24h or -80 °C for 30 min, prerequire for freeze-drying.
3. We transferred the samples in a freeze dryer (GAMMA 2-16 LSC) for 48 h. We load maximum 45 samples per run. We ensured that the vacuum reached at least 0.04 mbar.
4. After freeze drying, we removed the filter paper, and tape and put the lid back on the Falcon tubes. Weigh sample and note down dry weight (tube + sample). Then add one sterilized Zirconium oxide bead 6.8 mm (Saveen Werner) per tube.
5. For the substrates (S14, S26), we crushed for 1 min at 30 Hz, flipped the tubes and repeated the crushing. For the substrates S1, S15, S16, S18, S19, S20, S21, S22, we crushed for 45 s at maximum speed and repeated 3 times. We used FastPrep®-24 (MP Biomedicals) for crushing. We removed the crushing beads and washed.
6. We aliquoted the targeted desired weight of sample to new tube e.g. 3 g for dead wood. Added adequate volume of CTAB buffer according to the amount of substrate for DNA extraction e.g., 17 ml in Falcon tubes for dead wood, while for samples in Eppendorf 800 µl is enough. We vortexed vigorously and stored at -80 °C until processing.

***Protocol 4 – Sample processing of aerial spore filters, water filters and soil fauna***

The samples from the substrate Aerial spores (**S23**) were subjected to direct DNA extraction following the protocol described below (4. DNA extraction and purification). DNA from the substrates pond (**S24**) and stream (**S25**) followed the same protocol as **S23** but the Sterivex filters had to be manually removed, under a microbiological safety cabinet, from the surrounding plastic cover and cut out using a sterilized scalpel prior to extraction. To obtain pure mesofauna samples from our litter cores we placed the litter cores in Berlese-Tullgren funnels6. At the under side of each funnel we taped 50 ml Faclon tubes containing 15 ml of 70 % ethanol. Invertebrates were heat-extracted from each sample over 48 h, and the Falcon tubes were subsequently removed and stored at 4 °C for 5 days. Then, each sample was processed indepentendly under a stereo microsope in sterile Petri dishes; invertebrates were individually collected with a glass pipette and transferred into 2 ml Eppendorf tubes. Excess ethanol was removed using a pipette and letting samples evaporate under a sterile fume hood for 24 h. The samples were then dipped into liquid nitrogen for at least 5 seconds and stored at –80 °C until further processing.

**4. DNA extraction and purification**

DNA was extracted from the 26 substrates using three main protocols adapted for substrate characteristics.

For the substrates Soil (organic and litter), Fauna, Dead wood, Living core, we extracted genomic DNA with a modified CTAB/chloroform extraction7,8 and purified the DNA using the E.Z.N.A Soil DNA kit (Omega Bio-tek) following the protocol described by Maurice et al. (2021)9. The rest of the substrates were extracted using E-Z 96 DNA Plates (BD96-00). Briefly, we added 1.5 ml CTAB to all samples in 2 ml tubes, crushed them in the Tissue Lyzer for 1 min at 20 Hz before taking 725 µl of the supernatant into E-Z 96 Disruptor Plate C Plus for further mixing in the Tissue Lyzer. After a brief centrifuge, 72 µl DS buffer was added, the plates were vortexed and placed in an incubator at 70 °C for 15 min. The plates were centrifuged for 10 min before transferring 300 µl supernatant into 96 well deep-well plates. Next, 135 µl chilled P2 buffer and 200 µl of cHTR reagent was added, plates were sealed, vortexed and centrifuged. Of the clear supernatant about 400 µl of this is transferred to another new set of 96 well deep-well plates along with an equal amount of XP1 buffer, sealed and vortexed. From this step onwards, the DNA was purified following the same protocol mentioned above with the E.Z.N.A Soil DNA kit (Omega Bio-tek) described by Maurice et al. (2021)9.

We extracted DNA following the same protocol for aerial spores (**S23**), pond (**S24**), and stream (**S25**). Filters were placed in 50 ml Falcon tubes (aerial spores placed directly) containing 4 ml of 0.2 M Tris-HCl buffer and 2 ceramic beads, vortexed and placed under agitation at 600 rpm for 15 min at room temperature. Filters were removed and Falcon tubes were centrifuged at 3,500 rpm for 30 min at 6 °C. The top 1 ml supernatant was removed; 2 ml left for backup and remaining 1 ml for further extraction. Next, 100 µl Tris-HCl with 0.1% Chitinase was added before incubation at 37 °C for 90 min. Centrifuged at 3,500 rpm for 1 min, transferred 600 µl to 2 ml Eppendorf tube and add two tungsten beads and 600 ul CTAB with 2% ß-Mercaptoethanol. Crushed for 1 min at 30 Hz and repeat. Eppendorf tubes were incubated in heating block at 90 °C for 5 min and then placed in liquid nitrogen. Repeat heating and freezing step three times. Eppendorf tubes were incubated at 65 °C for 60 min with agitation at 800 rpm for 20 s interspersed with 10-min intervals. Once cooled, 800 µl chloroform were added to each sample, vortexed and centrifuged for 15 min at 3,500 rpm. We transferred 700 µl of the supernatant to 700 µl cold isopropanol in 1.5 ml tubes. The tubes were incubated overnight at 4 °C, then centrifuged at 3,500 rpm for 10 min, we decanted the supernatant and washed the DNA pellets with 300 µl of 70% ethanol twice, centrifuged at 3,500 rpm for 2 min each time. We removed the ethanol and placed the tubes on heating block at 50 °C to evaporate residual ethanol. Finally, 60 µl Tris-HCl was added to resuspend DNA.

DNA extraction for Dead wood samples, was performed in 50 ml Falcon tubes containing approximately 3 g of substrate along with 17 mL of CTAB. The soaked sawdust was incubated at 65 °C for 45 min and inverted 2-3 times. After allowing the mix to cool, 8 ml chloroform was added to each tube, they were vortexed vigorously and then centrifuged for 20 min at full speed. Next, 14 ml of the supernatant was pipetted into new Falcon tubes with equal amounts of cold isopropanol, the tubes were inverted, and the DNA was allowed to precipitate for a minimum of 30 min. The tubes were centrifuged for 10 min at full speed before pouring off the isopropanol, adding 500 µl cold ethanol and vortexing. The tubes were centrifuged again for 2 min, and the ethanol was carefully poured off. This wash step was repeated once more and then the tubes were placed on a heating block set to 55 °C to allow evaporation of any remaining ethanol. The DNA was resuspended in 300 µl Elution buffer and transferred to 2 mL Eppendorf tubes to be stored at –20 °C before following with DNA purification using E.Z.N.A Soil DNA kit and the protocol described by Maurice et al. (2021)9.

**5. PCR amplification, library preparation and Illumina sequencing**

DNA was quantified with Qubit BR DNA Assay (Invitrogen, Thermofisher Scientific cat. No Q32853) using a FLUOstar optima fluorescence microplate reader (BMG labtech). The rDNA ITS2 (Internal transcribed spacer region 2) was amplified through polymerase chain reaction (PCR) using uniquely tagged fungal-specific primers fITS7 and ITS410 with the Q5 High-Fidelity DNA polymerase (New England Biolabs) on 96-well plates. We included 1 negative control, 1 positive (mock community) control, and 6 PCR replicates per plate. Each reaction contained 9.75 µl MQ-H2O, 5 µl Q5 buffer (New England Biolabs), 5 µl Q5 GC enhancer (New England Biolabs), 0.5 µl 10 mM dNTPs, 1.25 µl of both forward and reverse primers, 0.25 µl Q5 polymerase (New England Biolabs), and 1 µl DNA template. The PCR amplicons were normalized with SequalPrep Normalization Plate Kit, 96-well (Thermofisher Scientific) and Ampure XP beads before being pooled into 9 separate libraries. The final concentration of the pooled libraries was checked by quantification using Qubit 4 Fluorometer (Invitrogen) with the kit Qubit dsDNA BR Assay (Invitrogen, Thermofisher Scientific cat. No Q32853). We stored the libraries at -80 °C until the shipment to Fasteris (Plan-Les-Ouates (GE), Switzerland). The nine libraries were multiplexed and paired-end sequenced in three sequencing lanes on the Illumina MiSeq platform.

**6. Bioinformatics and quality control**

***Denoising, clustering, filtering, and post clean-up***
After demultiplexing and removal of low read samples, we ran DADA2 with a few modifications to that described at <https://github.com/krabberod/omg/tree/main/01_Zazzy>. When running DADA210, we applied read filtering with *maxEE* = 2 for both reads and a minimum length threshold *minLen* = 50 rather than fixed truncation. For the error modeling, we increased the training size to 5 × 108 bp. During the denoising step we enabled full pooling across samples (*pool*=TRUE). The amplicon sequence variants (ASVs) were assigned stable SHA-1 hashed identifiers rather than sequential labels. After trimming of sequences with ITSx11 and clustering using VSEARCH12, we performed a post-clustering of OTUs with MUMU (<https://github.com/frederic-mahe/mumu>). Here, the centroids from VSEARCH12 were used as input to a BLASTn13 query to create an internal match list, and the new MUMU curated centroid file and OTU table were generated with default settings.

During the bioinformatic steps described in the main text and above, 34 samples (including 2 of the negative controls, and 5 PCR replicates) were removed due to low number of sequences. Four of the negative controls contained only 1 OTU, that was abundant across the dataset and the last three negatives contained up to 50 OTUs also present across the data. None of the positive control OTUs were present in any other sample, and the PCR replicates structured as expected according to substrate identity.

We continued with a series of post clean-up steps including removal of negative controls, positive controls (mocks), PCR replicates (total of 101 samples), and samples with below minimum threshold for rarefaction (993 reads) and/or below 2 OTUs (67 samples). We carefully inspected OTUs present in the positive and negative controls and detected only one likely contaminant, *Gloeoporus taxicola*, which occurred in high abundance in the living core samples. As this species is routinely handled in our laboratory (University of Oslo), we concluded that its presence in our dataset most likely reflected laboratory contamination. We also removed the host sequences from the following substrates *Usnea dasopoga*, *Trichaptum abietinum*, *Fomitopsis pinicola*, and *Hypogymnia physodes* since our focus was on the mycobiome associated with these organisms. After these filtering steps, the final non-rarified OTU table contained 4,816 fungal OTUs represented by a total of 10,245,712 sequences across 686 samples. The rarefied dataset, to 993 sequences per sample, included 681,198 sequences and 4,142 OTUs. The sequencing was part of a larger sequencing run, here we only analyzed the relevant 355 samples presented in this study (352,515 reads).

**7. Statistical analyses**

All data processing, statistical analyses and R scripts are documented and available at <https://github.com/MarkusFjelde/Ecosystem-sequencing>. All plots were initially produced in R using ggplot214 and base R functions and later edited and compiled using Adobe InDesign (Adobe Inc. 20.5, 2025).

***Ecological diversity analysis* *and statistical tests***To assess the differences in read abundance, we performed multiple tests across the five major substrate categories (Supplementary Fig. 4; Supplementary Table 4-5). We started with a coefficient-based Analysis of Covariance (ANCOVA) modelling the six most abundant phyla independently, as: ) = where was the natural logarithm of the richness adjusted read abundance, the intercept, the group variable (substrate category with five factor levels), and was OTU richness. Under this setup, we observed signs of non-linearity in the models for Ascomycota and Basidiomycota and therefore performed a square root transformation of the covariate richness (S). In addition, we performed two separate one-way ANOVAs using the function *aov*15 in R for the group differences in OTU richness and OTU evenness, respectively (Supplementary Table 4). All models were tested for normality with the *shapiro.test*16–18 and equal variances with *leveneTest*19 as well as manually inspected with standard diagnostic plots through plotting the fitted object with base R. We then obtained pairwise group comparisons by performing post-hoc tests based on the estimated marginal means (*emmeans_test*20) with bonferroni adjusted p-values accounting for multiple testing. We found deviations from normality and equal variance for all models and simplified our testing approach to only get between-group comparisons of the sum of read abundances. We still experienced violation of the underlying assumptions of normality and equal variance and finally ran non-parametric (Kruskal-Wallis21 rank sum test; *kruskal_test*, Dunn's test22 for pairwise multiple comparisons of ranked data; *dunn_test*) tests with the *rstatix*23 package to more robustly assumption free test for group differences (Supplementary Table 5).

***Multivariate analyses: dimensionality and variation components***Before landing on a 2-dimensional ordination, we ran a parallel ordination with DCA and NMDS with 4 dimensions to check interpretability and correlations of higher order axes (Supplementary Table 6; Supplementary Fig. 4). We observed only weak correlations between NMDS and DCA axes for k > 2 and could not impose any meaningful interpretation of these axes. We found evidence for a complete turnover of species composition with gradient lengths ranging from 5 half change (H.C.) units in the NMDS, and up to 15 SD units in the DCA ordinations (Fig. 4, Supplementary Fig. 4). A few additional samples were excluded in DCA and NMDS ordination analyses as they were flagged as outliers in initial analyses (see script 03.1-2: <https://github.com/MarkusFjelde/Ecosystem-sequencing>). To quantify the amount of variation explained by substrate affinity, we performed a constrained correspondence analysis (CCA) with categorical variables: *locality* and *substrate*, separately. First, we fitted the two CCA’s to check for significance, then we modelled the OTU abundances by substrate conditioned on locality (Supplementary Table 7). We obtained inertia components explained by the model of 12.654, and a residual component of 81.994. The fact that 30-70 % of the total inertia (TI) is attributed to “lack-of-fit-to-model” variation24, it makes it difficult to report exact proportions of variation explained. This “lack-of-fit-to-model” component can be especially large for datasets yielding longer gradients, as is the case with our data. The OTU-matrix, composed of complex variational patterns, where both residual and model components contain “lack-of-fit-to-model” variation due to polynomial distortions.

***Niche breadth and specificity analysis***We modelled the presence of OTUs (counts) across the five substrate categories using a zero-inflated negative binomial (family = *nbinom1*) generalized linear mixed model (GLMM25). We included a random intercept for each OTU (*1|OTU*) to specifically target the count variation not influenced by extreme OTUs. We performed a simple model comparison between the two different link-function families (*Poisson*, *nbinom1*) and chose the best performing model with lowest AIC and BIC values (see: <https://github.com/MarkusFjelde/Ecosystem-sequencing>). We performed model diagnostics with the package DHARMa26 using the functions; *simulateResiduals* (with *quantreg* = TRUE, n = 500), *testOutliers* (with *type* = “bootstrap”), and *plotResiduals*. We then predicted coefficients for each category using the *ggpredict* with bias correction (*bias_correction* = TRUE). Because OTUs fall within a specialist – generalist continuum it is not trivial to categorically classify them into robust groups that reflects exact ecological specialization patterns. Our approach classified substrate generalists and substrate specialists based on two main cut-off strategies (see Main Method section). From these two categories, we calculated several metrics per sample level: (i) number of specialists and generalists, (ii) their proportions to the total number of OTUs, and (iii) their proportional and relative read abundance (Fig. 5a-c; Supplementary Fig. 8a-b). To categorize the global trend of ecological specialization, we estimated the niche breadth for all OTUs using the Levins’ niche breadth index (Bn) with the package MicroNiche27. We used the function *levins.Bn* with R = 5 and otherwise default settings.

**Supplementary References**

1. Davey, M. L., Kauserud, H. & Ohlson, M. Forestry impacts on the hidden fungal biodiversity associated with bryophytes. *FEMS Microbiol. Ecol.* **90**, 313–325 (2014).

2. Davey, M. L. *et al.* Host and tissue variations overshadow the response of boreal moss-associated fungal communities to increased nitrogen load. *Mol. Ecol.* **26**, 571–588 (2017).

3. Kostich-Nilsen, C. A. Effects of forest management on needle fungal endophyte communities of Norway spruce (Picea abies). (2024).

4. Torp, V. Å. Forest management effects on aerial fungal biodiversity. (2023).

5. Moore, J. C., Tripp, B. B., Simpson, R. T. & Coleman, D. C. Springtails in the Classroom: Collembola as Model Organisms for Inquiry-Based Laboratories. *Am. Biol. Teach.* **62**, 512–519 (2000).

6. Gardes, M. & Bruns, T. D. ITS primers with enhanced specificity for basidiomycetes - application to the identification of mycorrhizae and rusts. *Mol. Ecol.* **2**, 113–118 (1993).

7. Murray, M. G. & Thompson, W. F. Rapid isolation of high molecular weight plant DNA. *Nucleic Acids Res.* **8**, 4321–4326 (1980).

8. Maurice, S. *et al.* Fungal sporocarps house diverse and host-specific communities of fungicolous fungi. *ISME J.* **15**, 1445–1457 (2021).

9. Ihrmark, K. *et al.* New primers to amplify the fungal ITS2 region – evaluation by 454-sequencing of artificial and natural communities. *FEMS Microbiol. Ecol.* **82**, 666–677 (2012).

10. Callahan, B. J. *et al.* DADA2: High-resolution sample inference from Illumina amplicon data. *Nat. Methods* **13**, 581–583 (2016).

11. Bengtsson-Palme, J. *et al.* Improved software detection and extraction of ITS1 and ITS2 from ribosomal ITS sequences of fungi and other eukaryotes for analysis of environmental sequencing data. *Methods Ecol. Evol.* **4**, 914–919 (2013).

12. Rognes, T., Flouri, T., Nichols, B., Quince, C. & Mahé, F. VSEARCH: a versatile open source tool for metagenomics. *PeerJ* **4**, e2584 (2016).

13. Altschul, S. F. *et al.* Gapped BLAST and PSI-BLAST: a new generation of protein database search programs. *Nucleic Acids Res.* **25**, 3389–3402 (1997).

14. Wickham, H. *et al.* ggplot2: Create Elegant Data Visualisations Using the Grammar of Graphics. (2025).

15. Venables, W. N. & Ripley, B. D. *Modern Applied Statistics with S*. (Springer Science & Business Media, 2013).

16. Royston, P. Remark AS R94: A Remark on Algorithm AS 181: The W-test for Normality. *Appl. Stat.* **44**, 547 (1995).

17. Royston, J. P. An Extension of Shapiro and Wilk’s W Test for Normality to Large Samples. *Appl. Stat.* **31**, 115 (1982).

18. Royston, J. P. Algorithm AS 181: The W Test for Normality. *Appl. Stat.* **31**, 176 (1982).

19. R: Levene’s Test. https://search.r-project.org/CRAN/refmans/car/html/leveneTest.html.

20. Lenth, R. V. *et al.* emmeans: Estimated Marginal Means, aka Least-Squares Means. (2025).

21. R: Kruskal-Wallis Test. https://search.r-project.org/CRAN/refmans/rstatix/html/kruskal_test.html.

22. R: Dunn’s Test of Multiple Comparisons. https://search.r-project.org/CRAN/refmans/rstatix/html/dunn_test.html.

23. Kassambara, A. rstatix: Pipe-Friendly Framework for Basic Statistical Tests. (2023).

24. Økland, R. H. On the variation explained by ordination and constrained ordination axes. *J. Veg. Sci.* **10**, 131–136 (1999).

25. Brooks, M. *et al.* glmmTMB: Generalized Linear Mixed Models using Template Model Builder. (2025).

26. Hartig, F., Lohse, L. & leite, M. de S. DHARMa: Residual Diagnostics for Hierarchical (Multi-Level / Mixed) Regression Models. (2024).

27. Finn, D. MicroNiche: Microbial Niche Measurements. (2020).

28. Asplund, J. *et al.* Long term effects of forest management on forest structure and dead wood in mature boreal forests. *For. Ecol. Manag.* **572**, 122315 (2024).

**Supplementary Figures**

**Supplementary Fig. 1. The three sampling sites in Southeastern Norway.** Photos of the spruce-dominated boreal forests at **a**: Blåfjell (BLÅ), **b**: Skotjernfjell (SKO), **c**: Tretjerna (TRE). **d**, map of South-Eastern Norway showing the geographical locations of each sampling site (a-c). Photos: EcoForest.

**Supplementary Fig. 2. Sample processing and DNA extraction protocols of boreal forest substrates.** The 26 studied boreal forest substrates (S1-S26) grouped into five substrate categories (soil, ground vegetation, tree-related, aerial-aquatic, and feces). Colors of substrate names and adjacent symbols indicate the different sample processing and DNA extraction protocols used for the different substrate types. A, B in ground vegetation substrates indicates aboveground (A) and belowground (B).

**Supplementary Fig. 3. Accumulation curves for individual substrates. a–e**, substrates organized by categories showing accumulation curves with number of OTUs against number of sequences.

**Supplementary Fig. 4. Differential abundance and richness across substrate categories. a-f**, boxplots showing per sample read abundances and OTU richness for the 6 most abundant fungal phyla. **g-h**, the total OTU richness and evenness across the entire rarefied dataset. **i**, hierarchical clustering dendrogram of the five substrate categories. All categories indicated with corresponding colors: turquoise (aerial-aquatic), black (feces), light green (ground vegetation), dark green (tree-related), brown (soil).

**Supplementary Fig. 5. Multi parallel ordination performed on sample-level. a**, Detrended correspondence analysis (DCA) and **b**, non-metric multidimensional scaling (NMDS) of the main dataset showing similar structuring of boreal forest substrates. The DCA ordination showing clear signs of a “tongue”-effect mostly due to moose droppings having highly unique placement in the ordination space. **c,** Principal Component Analysis (PCA) of the two first axes in the DCA and NMDS ordinations showing strong correlations between both. **d–e**, Histograms of the uncorrected (d) and geodetic distance corrected (e) Bray-Curtis dissimilarities from the OTU-matrix.

**Supplementary Fig. 6. Community analyses of the main boreal forest compartments.** The different subordinations (NMDSs) performed on substrate categories with **a**: soil (Fauna, Soil litter, Soil organic, Roots), **b**: ground vegetation (*A. flexuosa* A & B, V. myrtillus A & B, *H. splendens* A & B, *P. schreberi* A & B), **c**: feces (Moose droppings), **d**: tree-related (Surface, Bark, *H. physodes*, *U. dasopoga*, *F. pinicola*, *T. abietinum*, Dead wood, Living core, Cone), **e**: aerial-aquatic (Aerial spores, Pond, Stream).

**Supplementary Fig. 7. Nestedness and network analyses of the boreal forest mycobiome.** OTU network of fungal community, nestedness based on overlap and decreasing fill (NODF), and heat map of shared number of OTUs by substrate (**a-c**) and substrate category (**d-f**). To highlight the patterns of overlap in composition and reduce overplotting; the per substrate network shows OTUs present in 40% of samples within each substrate, and the per category network OTUs present in 10% of samples. In **b** and **e**,the shaded areas indicate OTU presence and white absence. In **c** and **f**, high number of shared OTUs are indicated with green to lower in salmon to gray.

**Supplementary Fig. 8. Niche breadth analyses. a**, Number of generalists against specialists under restrictive definition on natural log scale. **b**, Boxplots showing the per sample number of OTUs that are classified into specialists and generalists (under both definitions). **c**, The distribution of Levin’s niche breadth index (Bn) for all OTUs in the full dataset. **d**, Predicted coefficients of category specific counts (log-scale) from a zero-inflated negative binomial generalized linear mixed model (GLMM). **e**, NMDS species scores ordination with smooth surface showing the fitted Generalized Additive Model (GAM) model with number of substrates as explanatory variable.

**Supplementary Table 1.** General description of the three old-growth boreal forests in South-Eastern Norway. Latitude and longitude are registered in decimal degrees (WGS84), elevation in meters (m) above sea level, mean annual temperature (MAT) in °C and mean annual precipitation (MAP) in mm. Stand age corresponds to the basal area weighted breast height age (years) of 3 to 7 dominant trees, measured in square meter per hectare (m2/ha) within a 15 m × 15 m plot28.

| **Site Name** | **Latitude (°N)** | **Longitude (°E)** | **Elevation** | **MAT** | **MAP** | **Stand age** |
| --- | --- | --- | --- | --- | --- | --- |
| Tretjerna (TRE) | 60.5836 | 10.2265 | 472 | 2.7 | 821 | 99 |
| Skotjernfjell (SKO) | 60.2422 | 10.7960 | 610 | 2.3 | 974 | 189 |
| Blåfjell (BLÅ) | 59.7831 | 10.3813 | 264 | 4.8 | 1041 | 147 |

**Supplementary Table 2.** Information on the biological properties of the individual substrate materials (Properties), their corresponding substrate category (Category), brief field sampling technique (Sampling), mean input material in mg (10-3g; Input material), comment on input material of dry weight into DNA analyses (Comment input material), associated protocol numbering for processing and DNA extraction (Protocol Proc/DNA; see Supplementary material and methods).

| **Substrate** | **Properties** | **Category** | **Sampling** | **Comment  (input material)** | **Input  (10-3g)** | **Prot.  (proc.)** | **Prot.  (DNA)** |
| --- | --- | --- | --- | --- | --- | --- | --- |
| **Fauna** | Animal tissue | Soil | Litter core + (mesh) | Epigeic springtails: 176,6.  Endogeic: 150. Orabatida: 836,3.  Mesostigmata: 453,3. | ***NA*** | 4 | 1 |
| **Soil litter** | Humus (0 horizon) | Soil | Soil core + sieve (5 mm mesh) | Sartorius, CP 423 S | 208 | 1 | 1 |
| **Soil organic** | Top soil (A horizon) | Soil | Soil core + sieve (5 mm mesh) | Sartorius, CP 423 S | 223 | 1 | 1 |
| **Roots** | Mixed plant roots | Soil | Root "residues" after sieve | Sartorius, CP 423 S | 172 | 2 | 2 |
| ***A. flexuosa* A** | Stem and leaves | Ground vegetation | Direct (sterilization) | Sartorius, CP 423 S | 40 | 2 | 2 |
| ***A. flexuosa* B** | Hair roots | Ground vegetation | Direct (sterilization) | Sartorius, CP 423 S | 70 | 2 | 2 |
| ***V. myrtillus* A** | Stem and leaves | Ground vegetation | Direct (sterilization) | Sartorius, CP 423 S | 210 | 2 | 2 |
| ***V. myrtillus* B** | Hair roots | Ground vegetation | Direct (sterilization) | Sartorius, CP 423 S | 20 | 2 | 2 |
| ***H. splendens* A** | Living part leaves | Ground vegetation | Direct (sterilization) | Sartorius, CP 423 S | 40 | 2 | 2 |
| ***H. splendens* B** | Senescent part leaves | Ground vegetation | Direct (sterilization) | Sartorius, CP 423 S | 50 | 2 | 2 |
| ***P. schreberi* A** | Living part leaves | Ground vegetation | Direct (sterilization) | Sartorius, CP 423 S | 30 | 2 | 2 |
| ***P. schreberi* B** | Senescent part leaves | Ground vegetation | Direct (sterilization) | Sartorius, CP 423 S | 20 | 2 | 2 |
| **Surface** | Surface scrape (mix) | Tree-related | Metal brush scrape  360 degrees stem | Sartorius, CP 423 S | 232 | 3 | 2 |
| **Bark** | Outer periderm bark | Tree-related | Bark piece | Sartorius, CP 423 S | 228 | 3 | 2 |
| ***H. physodes*** | Lichen thalli | Tree-related | Direct (no sterilization) | Sartorius, CP 423 S | 118 | 3 | 2 |
| ***U. dasopoga*** | Lichen thalli | Tree-related | Direct (no sterilization) | Sartorius, CP 423 S | 74 | 3 | 2 |
| ***F. pinicola*** | Polypore hymenium  (sporocarp) | Tree-related | Direct (no sterilization) | Sartorius, CP 423 S | 210 | 3 | 2 |
| ***T. abietinum*** | Polypore hymenium  (sporocarp) | Tree-related | Direct (no sterilization) | Sartorius, CP 423 S | 134 | 3 | 2 |
| **Dead wood** | Sawdust | Tree-related | Saw dust sampling (size) | Sartorius, CP 423 S | 3000 | 3 | 1 |
| **Living core** | Cambium, Sapwood,  Heartwood | Tree-related | 200 × 3.5 mm increment borer | Sartorius, CP 423 S | 213 | 3 | 1 |
| **Cone** | Fallen spruce cone | Tree-related | Direct (no sterilization) | Sartorius, CP 423 S | 230 | 3 | 2 |
| **Needles** | Living spruce needles | Tree-related | Cut off fresh shoots + manual  separation (sterilization) | 5 single spruce needles  (Sartorius, CP 423 S) | 170 | 2 | 2 |
| **Aerial spores** | DNA/cellular tissue | Aquatic-aerial | Air filters (Cyclopore  polycarbonate  Membrane 1 μm) | ***NA*** | ***NA*** | 4 | 3 |
| **Pond** | DNA/cellular tissue | Aquatic-aerial | Water filters (Millipore Sterivex Pressure filters 0.22 μm) | ***NA*** | ***NA*** | 4 | 3 |
| **Stream** | DNA/cellular tissue | Aquatic-aerial | Water filters (Millipore Sterivex  Pressure filters 0.22 μm) | ***NA*** | ***NA*** | 4 | 3 |
| **Moose droppings** | Feces from Moose  (*Alces alces*) | Feces | Direct (no sterilization) | Sartorius, CP 423 S | 1000 | 3 | 2 |

**Supplementary Table 3.** OTU and sample statistics for individual substrates. Showing number of included samples (N), number of non-rarefied reads (Reads), number of OTUs, unique OTUs, proportion of unique OTUs, core OTUs (present in at least of substrate samples), proportion of core OTUs, Number of fungal phyla, classes and orders.

| **Substrate** | **N** | **# of reads** | **# of OTUs** | **Unique OTUs** | **Unique OTUs(%)** | **Core OTUs** | **Core OTUs(%)** | **# of phyla** | **# of classes** | **# of orders** |
| --- | --- | --- | --- | --- | --- | --- | --- | --- | --- | --- |
| Fauna | 15 | 875,291 | 783 | 147 | 18,77 | 68 | 8,68 | 9 | 38 | 99 |
| Soil litter | 15 | 604,836 | 574 | 27 | 4,7 | 68 | 11,85 | 6 | 22 | 73 |
| Soil organic | 14 | 849,191 | 557 | 72 | 12,93 | 44 | 7,9 | 8 | 28 | 77 |
| Roots | 14 | 422,876 | 433 | 30 | 6,93 | 26 | 6 | 7 | 28 | 75 |
| *A. flexuosa* A | 15 | 623,900 | 244 | 25 | 10,25 | 27 | 11,07 | 5 | 22 | 59 |
| *A. flexuosa* B | 15 | 623,835 | 271 | 24 | 8,86 | 15 | 5,54 | 7 | 25 | 68 |
| *V. myrtillus* A | 15 | 480,467 | 148 | 16 | 10,81 | 14 | 9,46 | 4 | 18 | 48 |
| *V. myrtillus* B | 14 | 392,766 | 135 | 5 | 3,7 | 5 | 3,7 | 4 | 16 | 44 |
| *H. splendens* A | 9 | 178,919 | 57 | 2 | 3,51 | 0 | 0 | 5 | 16 | 29 |
| *H. splendens* B | 15 | 227,571 | 353 | 53 | 15,01 | 11 | 3,12 | 8 | 25 | 74 |
| *P. schreberi* A | 9 | 92,670 | 113 | 9 | 7,96 | 2 | 1,77 | 7 | 17 | 41 |
| *P. schreberi* B | 14 | 304,722 | 177 | 20 | 11,3 | 4 | 2,26 | 7 | 19 | 45 |
| Surface | 15 | 446,474 | 499 | 92 | 18,44 | 86 | 17,23 | 9 | 31 | 86 |
| Bark | 15 | 540,644 | 329 | 36 | 10,94 | 5 | 1,52 | 7 | 31 | 81 |
| *H. physodes* | 15 | 126,267 | 476 | 57 | 11,97 | 64 | 13,45 | 6 | 29 | 84 |
| *U. dasopoga* | 14 | 197,386 | 336 | 39 | 11,61 | 47 | 13,99 | 5 | 22 | 66 |
| *F. pinicola* | 9 | 65,786 | 301 | 23 | 7,64 | 42 | 13,95 | 6 | 27 | 69 |
| *T. abietinum* | 13 | 131,750 | 457 | 55 | 12,04 | 54 | 11,82 | 8 | 30 | 78 |
| Dead wood | 15 | 451,705 | 641 | 217 | 33,85 | 16 | 2,5 | 7 | 31 | 96 |
| Living core | 14 | 482,785 | 101 | 29 | 28,71 | 5 | 4,95 | 3 | 20 | 41 |
| Cone | 15 | 345,067 | 485 | 51 | 10,52 | 45 | 9,28 | 7 | 29 | 88 |
| Needles | 7 | 117,777 | 18 | 3 | 16,67 | 1 | 5,56 | 2 | 7 | 14 |
| Aerial spores | 15 | 974,943 | 625 | 100 | 16 | 35 | 5,6 | 6 | 28 | 95 |
| Pond | 15 | 146,005 | 717 | 251 | 35,01 | 13 | 1,81 | 10 | 36 | 98 |
| Stream | 15 | 212,839 | 646 | 308 | 47,68 | 15 | 2,32 | 10 | 37 | 89 |
| Moose droppings | 14 | 329,240 | 141 | 62 | 43,97 | 22 | 15,6 | 6 | 20 | 37 |

**Supplementary Table 4.** Table with Kendall’s tau () correlations between different variables (1 & 2), including OTU Richness, OTU Evenness, Read depth, Beta diversity (Bray-Curtis), and Total OTUs. Showing the correlation coefficients (cor), z-score (T statistic for small sample sizes), degrees of freedom (df), and p-values (p).

| **Variable 1** | **Variable 2** | **cor** | **Z (T)** | **p** |
| --- | --- | --- | --- | --- |
| OTU Richness (S) | Evenness (J) | 0.221 | 6.178 | 0.000 |
| OTU Richness (S) | Read depth | –0.008 | –0.214 | 0.831 |
| Evenness (J) | Read depth | 0.019 | 0.536 | 0.592 |
|  |  |  |  |  |
| OTU Richness (S) | Evenness | 0.440 | 234 | 0.001 |
| OTU Richness (S) | Beta diversity (BCjk) | –0.273 | 118 | 0.051 |
| Evenness (J) | Beta diversity (BCjk) | –0.009 | 161 | 0.965 |
| Beta diversity (BCjk) | Read depth | 0.175 | 191 | 0.219 |
| OTU Richness (S) | Read depth | 0.083 | 176 | 0.570 |
| Evenness (J) | Read depth | 0.075 | 175 | 0.600 |
|  |  |  |  |  |
| Total OTUs | OTU Richness (S) | 0.747 | 284 | 0.000 |
| Total OTUs | Evenness (J) | 0.520 | 247 | 0.0001 |
| Total OTUs | Read depth | 0.188 | 193 | 0.188 |

**Supplementary Table 5.** Pairwise comparisons between the read abundance among substrate categories for the six most abundant phyla: Ascomycota (Kruskal Wallis: χ2 = 90.199, df = 4, p < 2.2e-16), Basidiomycota (Kruskal Wallis: χ2 = 66.563, df = 4, p = 1.205e-13), Chytridiomycota (Kruskal Wallis: χ2 = 53.517, df = 4, p = 6.644e-11), Mortierellomycota (Kruskal Wallis: χ2 = 43.406, df = 3, p = 2.018e-09), Mucoromycota (Kruskal Wallis: χ2 = 10.173, df = 3, p = 0.01715), Rozellomycota (Kruskal Wallis: χ2 = 16.147, df = 4, p = 0.002828). In addition, pairwise comparisons of overall OTU richness (Kruskal Wallis: χ2 = 118.65, df = 4, p < 2.2e-16) and evenness (Kruskal Wallis: χ2 = 75.607, df = 4, p = 1.483e-15) between substrate categories. Pairwise comparisons with Dunn’s test showing sample sizes (group; n1, group 2; n2), Dunn’s Z-statistic, ordinary p-value (p), bonferroni adjusted p-value (p adj), and the significance level (1 * = 1 decimal point).

| **ASCOMYCOTA** | **n1** | **n2** | **estimate** | **estimate1** | **estimate2** | **statistic** | **p** | **p adj** | **sign** |
| --- | --- | --- | --- | --- | --- | --- | --- | --- | --- |
| Aquatic-aerial × feces | 45 | 14 | 122,50 | 130,93 | 253,43 | 3,94 | 0,000 | 0,001 | *** |
| Aquatic-aerial × ground vegetation | 45 | 105 | 34,01 | 130,93 | 164,94 | 1,88 | 0,060 | 0,600 | ns |
| Aquatic-aerial × soil | 45 | 58 | -36,01 | 130,93 | 94,92 | -1,79 | 0,074 | 0,740 | ns |
| Aquatic-aerial × tree-related | 45 | 129 | 97,84 | 130,93 | 228,77 | 5,57 | 0,000 | 0,000 | **** |
| Feces × ground vegetation | 14 | 105 | -88,49 | 253,43 | 164,94 | -3,06 | 0,002 | 0,022 | * |
| Feces× soil | 14 | 58 | -158,51 | 253,43 | 94,92 | -5,25 | 0,000 | 0,000 | **** |
| Feces × tree-related | 14 | 129 | -24,66 | 253,43 | 228,77 | -0,86 | 0,388 | 1,000 | ns |
| Ground vegetation× soil | 105 | 58 | -70,02 | 164,94 | 94,92 | -4,22 | 0,000 | 0,000 | *** |
| Ground vegetation × tree-related | 105 | 129 | 63,83 | 164,94 | 228,77 | 4,79 | 0,000 | 0,000 | **** |
| Soil × tree-related | 58 | 129 | 133,85 | 94,92 | 228,77 | 8,34 | 0,000 | 0,000 | **** |
| **BASIDIOMYCOTA** | **n1** | **n2** | **estimate** | **estimate1** | **estimate2** | **statistic** | **p** | **p adj** | **sign** |
| Aquatic-aerial × feces | 45 | 14 | -16,29 | 143,54 | 127,25 | -0,53 | 0,599 | 1,000 | ns |
| Aquatic-aerial × ground vegetation | 45 | 102 | 53,31 | 143,54 | 196,85 | 2,94 | 0,003 | 0,032 | * |
| Aquatic-aerial × soil | 45 | 58 | 113,15 | 143,54 | 256,70 | 5,63 | 0,000 | 0,000 | **** |
| Aquatic-aerial × tree-related | 45 | 131 | -4,49 | 143,54 | 139,06 | -0,26 | 0,797 | 1,000 | ns |
| Feces × ground vegetation | 14 | 102 | 69,60 | 127,25 | 196,85 | 2,41 | 0,016 | 0,158 | ns |
| Feces× soil | 14 | 58 | 129,45 | 127,25 | 256,70 | 4,30 | 0,000 | 0,000 | *** |
| Feces × tree-related | 14 | 131 | 11,81 | 127,25 | 139,06 | 0,42 | 0,678 | 1,000 | ns |
| Ground vegetation× soil | 102 | 58 | 59,85 | 196,85 | 256,70 | 3,60 | 0,000 | 0,003 | ** |
| Ground vegetation × tree-related | 102 | 131 | -57,80 | 196,85 | 139,06 | -4,33 | 0,000 | 0,000 | *** |
| Soil × tree-related | 58 | 131 | -117,64 | 256,70 | 139,06 | -7,37 | 0,000 | 0,000 | **** |
| **CHYTRIDIOMYCOTA** | **n1** | **n2** | **estimate** | **estimate1** | **estimate2** | **statistic** | **p** | **p adj** | **sign** |
| Aquatic-aerial × feces | 29 | 3 | -42,34 | 83,17 | 40,83 | -2,39 | 0,017 | 0,171 | ns |
| Aquatic-aerial × ground vegetation | 29 | 30 | -34,41 | 83,17 | 48,77 | -4,51 | 0,000 | 0,000 | **** |
| Aquatic-aerial × soil | 29 | 13 | -51,10 | 83,17 | 32,08 | -5,23 | 0,000 | 0,000 | **** |
| Aquatic-aerial × tree-related | 29 | 27 | -52,12 | 83,17 | 31,06 | -6,66 | 0,000 | 0,000 | **** |
| Feces × ground vegetation | 3 | 30 | 7,93 | 40,83 | 48,77 | 0,45 | 0,654 | 1,000 | ns |
| Feces× soil | 3 | 13 | -8,76 | 40,83 | 32,08 | -0,47 | 0,640 | 1,000 | ns |
| Feces × tree-related | 3 | 27 | -9,78 | 40,83 | 31,06 | -0,55 | 0,583 | 1,000 | ns |
| Ground vegetation× soil | 30 | 13 | -16,69 | 48,77 | 32,08 | -1,72 | 0,086 | 0,859 | ns |
| Ground vegetation × tree-related | 30 | 27 | -17,71 | 48,77 | 31,06 | -2,28 | 0,023 | 0,225 | ns |
| Soil × tree-related | 13 | 27 | -1,02 | 32,08 | 31,06 | -0,10 | 0,918 | 1,000 | ns |
| **MORTIERELLOMYCOTA** | **n1** | **n2** | **estimate** | **estimate1** | **estimate2** | **statistic** | **p** | **p adj** | **sign** |
| Aquatic-aerial × ground vegetation | 12 | 4 | -14,00 | 73,13 | 59,13 | -0,86 | 0,389 | 1,000 | ns |
| Aquatic-aerial × soil | 12 | 51 | -14,57 | 73,13 | 58,56 | -1,61 | 0,106 | 0,639 | ns |
| Aquatic-aerial × tree-related | 12 | 30 | -51,38 | 73,13 | 21,75 | -5,35 | 0,000 | 0,000 | **** |
| Ground vegetation× soil | 4 | 51 | -0,57 | 59,13 | 58,56 | -0,04 | 0,969 | 1,000 | ns |
| Ground vegetation× tree-related | 4 | 30 | -37,38 | 59,13 | 21,75 | -2,50 | 0,013 | 0,075 | ns |
| Soil × tree related | 51 | 30 | -36,81 | 58,56 | 21,75 | -5,69 | 0,000 | 0,000 | **** |
| **MUCOROMYCOTA** | **n1** | **n2** | **estimate** | **estimate1** | **estimate2** | **statistic** | **p** | **p adj** | **sign** |
| Aquatic-aerial × ground vegetation | 4 | 11 | 2,63 | 35,88 | 38,50 | 0,24 | 0,812 | 1,000 | ns |
| Aquatic-aerial × soil | 4 | 42 | 0,07 | 35,88 | 35,94 | 0,01 | 0,995 | 1,000 | ns |
| Aquatic-aerial × tree-related | 4 | 9 | -20,93 | 35,88 | 14,94 | -1,84 | 0,066 | 0,395 | ns |
| Ground vegetation× soil | 11 | 42 | -2,56 | 38,50 | 35,94 | -0,40 | 0,690 | 1,000 | ns |
| Ground vegetation× tree-related | 11 | 9 | -23,56 | 38,50 | 14,94 | -2,77 | 0,006 | 0,034 | * |
| Soil × tree related | 42 | 9 | -21,00 | 35,94 | 14,94 | -3,02 | 0,003 | 0,015 | * |
| **ROZELLOMYCOTA** | **n1** | **n2** | **estimate** | **estimate1** | **estimate2** | **statistic** | **p** | **p adj** | **sign** |
| Aquatic-aerial × feces | 17 | 2 | -18,46 | 40,71 | 22,25 | -1,55 | 0,120 | 1,000 | ns |
| Aquatic-aerial × ground vegetation | 17 | 4 | -22,58 | 40,71 | 18,13 | -2,56 | 0,011 | 0,106 | ns |
| Aquatic-aerial × soil | 17 | 18 | -18,65 | 40,71 | 22,06 | -3,47 | 0,001 | 0,005 | ** |
| Aquatic-aerial × tree-related | 17 | 14 | -16,85 | 40,71 | 23,86 | -2,94 | 0,003 | 0,033 | * |
| Feces × ground vegetation | 2 | 4 | -4,13 | 22,25 | 18,13 | -0,30 | 0,764 | 1,000 | ns |
| Feces× soil | 2 | 18 | -0,19 | 22,25 | 22,06 | -0,02 | 0,987 | 1,000 | ns |
| Feces × tree-related | 2 | 14 | 1,61 | 22,25 | 23,86 | 0,13 | 0,894 | 1,000 | ns |
| Ground vegetation× soil | 4 | 18 | 3,93 | 18,13 | 22,06 | 0,45 | 0,655 | 1,000 | ns |
| Ground vegetation × tree-related | 4 | 14 | 5,73 | 18,13 | 23,86 | 0,64 | 0,525 | 1,000 | ns |
| Soil × tree-related | 18 | 14 | 1,80 | 22,06 | 23,86 | 0,32 | 0,750 | 1,000 | ns |
| **OTU RICHNESS** | **n1** | **n2** | **estimate** | **estimate1** | **estimate2** | **statistic** | **p** | **p adj** | **sign** |
| Aquatic-aerial × feces | 45 | 14 | 210,02 | 210,02 | 114,71 | -3,03 | 0,002 | 0,024 | * |
| Aquatic-aerial × ground vegetation | 45 | 106 | 210,02 | 210,02 | 98,31 | -6,12 | 0,000 | 0,000 | **** |
| Aquatic-aerial × soil | 45 | 58 | 210,02 | 210,02 | 261,40 | 2,52 | 0,012 | 0,117 | ns |
| Aquatic-aerial × tree-related | 45 | 132 | 210,02 | 210,02 | 201,14 | -0,50 | 0,616 | 1,000 | ns |
| Feces × ground vegetation | 14 | 106 | 114,71 | 114,71 | 98,31 | -0,56 | 0,574 | 1,000 | ns |
| Feces× soil | 14 | 58 | 114,71 | 114,71 | 261,40 | 4,80 | 0,000 | 0,000 | **** |
| Feces × tree-related | 14 | 132 | 114,71 | 114,71 | 201,14 | 3,00 | 0,003 | 0,027 | * |
| Ground vegetation× soil | 106 | 58 | 98,31 | 98,31 | 261,40 | 9,73 | 0,000 | 0,000 | **** |
| Ground vegetation × tree-related | 106 | 132 | 98,31 | 98,31 | 201,14 | 7,68 | 0,000 | 0,000 | **** |
| Soil × tree-related | 58 | 132 | 261,40 | 261,40 | 201,14 | -3,73 | 0,000 | 0,002 | ** |
| **OTU EVENNESS** | **n1** | **n2** | **estimate** | **estimate1** | **estimate2** | **statistic** | **p** | **p adj** | **sign** |
| Aquatic-aerial × feces | 45 | 14 | 260,11 | 260,11 | 113,07 | -4,68 | 0,000 | 0,000 | **** |
| Aquatic-aerial × ground vegetation | 45 | 106 | 260,11 | 260,11 | 119,03 | -7,73 | 0,000 | 0,000 | **** |
| Aquatic-aerial × soil | 45 | 58 | 260,11 | 260,11 | 201,16 | -2,89 | 0,004 | 0,038 | * |
| Aquatic-aerial × tree-related | 45 | 132 | 260,11 | 260,11 | 194,08 | -3,73 | 0,000 | 0,002 | ** |
| Feces × ground vegetation | 14 | 106 | 113,07 | 113,07 | 119,03 | 0,20 | 0,838 | 1,000 | ns |
| Feces× soil | 14 | 58 | 113,07 | 113,07 | 201,16 | 2,88 | 0,004 | 0,039 | * |
| Feces × tree-related | 14 | 132 | 113,07 | 113,07 | 194,08 | 2,81 | 0,005 | 0,050 | * |
| Ground vegetation× soil | 106 | 58 | 119,03 | 119,03 | 201,16 | 4,90 | 0,000 | 0,000 | **** |
| Ground vegetation × tree-related | 106 | 132 | 119,03 | 119,03 | 194,08 | 5,61 | 0,000 | 0,000 | **** |
| Soil × tree-related | 58 | 132 | 201,16 | 201,16 | 194,08 | -0,44 | 0,661 | 1,000 | ns |

**Supplementary Table 6.** Correlation table of ordination axes (non-metric multidimensional scaling against detrended correspondence analysis). Showing the Pearson’s r correlation coefficient, 95% confidence intervals, t-value (t), degrees of freedom (df), and p-value (p).

| **Ord axes** | **cor** | **95% lower** | **95 % upper** | **t** | **df** | **p** |
| --- | --- | --- | --- | --- | --- | --- |
| NMDS1 ~ DCA1 | 0.928 | 0.911 | 0.941 | 45.367 | 333 | 2.2e-16 |
| NMDS2 ~ DCA2 | 0.501 | 0.417 | 0.578 | 10.576 | 333 | 2.2e-16 |
| NMDS3 ~ DCA3 | 0.161 | 0.055 | 0.264 | 2.976 | 333 | 0.003132 |
| NMDS4 ~ DCA4 | 0.170 | 0.064 | 0.273 | 3.155 | 333 | 0.001751 |

**Supplementary Table 7.** Summary table of the constrained correspondence analysis (CCA). From the model: OTU ~ substrate + condition(site). Showing degrees of freedom (Df), inertia components (Inertia), F-value (F), and p-value (p).

|  | **df** | **Inertia** | **F** | **p** |
| --- | --- | --- | --- | --- |
| **Model** | 25 | 1.654 | 2.0187 | 0.001 |
| **Residual** | 327 | 81.994 |  |  |

**Supplementary Table 8.** Nestedness analysis using *oecosimu* with function nestednodf and method t-swap on both substrate category and single substrate level. Showing the estimated matrix temperature (statistic) and its distribution under the null hypothesis (mean, 2.5%, 50%, 97.5%), the standardized effect size (SES), simulated two-sided p-value (Pr(sim.); nsimul = 999). N. columns reflecting the OTU component and N. rows the substrate/category of the NODF (nestedness based on overlap and decreasing fill).

| **Category level** |  |  |  |  |  |  |  |
| --- | --- | --- | --- | --- | --- | --- | --- |
|  | **statistic** | **SES** | **mean** | **2.5%** | **50 %** | **97.5 %** | **Pr(sim.)** |
| **N.columns** | 15,433 | -0,620 | 15,574 | 15,171 | 15,562 | 16,025 | 0,581 |
| **N.rows** | 18,386 | 1,349 | 17,869 | 17,196 | 17,877 | 18,705 | 0,207 |
| **NODF** | 15,433 | -0,619 | 15,574 | 15,171 | 15,562 | 16,025 | 0,581 |
| **Substrate level** |  |  |  |  |  |  |  |
| **N.columns** | 10,718 | -3,480 | 11,405 | 10,852 | 11,489 | 11,605 | 0,003 |
| **N.rows** | 14,525 | -2,126 | 15,394 | 14,540 | 15,343 | 16,128 | 0,047 |
| **NODF** | 10,730 | -3,489 | 11,417 | 10,863 | 11,498 | 11,618 | 0,003 |
